# Supplementary material
Source: publisher figshare collection journal article supplement (https://rs.figshare.com/ndownloader/files/42364665)
Supplement: Supplementary file 1 [file 42364665]

Recorder ID,Sample Number,Interval Number,Interval Number B,Total Count,Bear Event a,Bear Event b,Distance Bear-Nest (m),Duration Bear-Viewshed (min),Viewshed Area (m2),AVG Baseline,HR Differences,Duration.Viewshed.Area,Duration.Viewshed.Area Scaled,Date,Time of day ,Buffer distances,Date deployed,incubation stage deployment,days until sample,incubation stage sample,Kestrel ID ,Kestrel time (yyyy-MM-dd hh:mm:ss),Temp (Celsius) ,Wind Speed (m/s)
3,1,1,1,18,2,2,71,2,25751.67,18,0,7.77E-05,7.766486601,01-Jul,9:40:00,5,24-Jun,6,7,13,Camp,2019-07-01 9:30,1.8,6.6
3,1,2,2,27,2,2,71,2,25751.67,18,9,7.77E-05,7.766486601,01-Jul,9:40:00,5,24-Jun,6,7,13,Camp,2019-07-01 9:30,1.8,6.6
3,1,3,3,18,2,2,71,2,25751.67,18,0,7.77E-05,7.766486601,01-Jul,9:40:00,5,24-Jun,6,7,13,Camp,2019-07-01 9:30,1.8,6.6
3,1,4,4,19,2,2,71,2,25751.67,18,1,7.77E-05,7.766486601,01-Jul,9:40:00,5,24-Jun,6,7,13,Camp,2019-07-01 9:30,1.8,6.6
3,1,5,5,35,2,2,71,2,25751.67,18,17,7.77E-05,7.766486601,01-Jul,9:40:00,5,24-Jun,6,7,13,Camp,2019-07-01 9:30,1.8,6.6
3,1,6,6,17,2,2,71,2,25751.67,18,-1,7.77E-05,7.766486601,01-Jul,9:40:00,5,24-Jun,6,7,13,Camp,2019-07-01 9:30,1.8,6.6
3,1,7,7,40,2,2,71,2,25751.67,18,22,7.77E-05,7.766486601,01-Jul,9:40:00,5,24-Jun,6,7,13,Camp,2019-07-01 9:30,1.8,6.6
3,1,8,8,31,2,2,71,2,25751.67,18,13,7.77E-05,7.766486601,01-Jul,9:40:00,5,24-Jun,6,7,13,Camp,2019-07-01 9:30,1.8,6.6
3,1,9,9,47,2,2,71,2,25751.67,18,29,7.77E-05,7.766486601,01-Jul,9:40:00,5,24-Jun,6,7,13,Camp,2019-07-01 9:30,1.8,6.6
3,1,10,10,31,2,2,71,2,25751.67,18,13,7.77E-05,7.766486601,01-Jul,9:40:00,5,24-Jun,6,7,13,Camp,2019-07-01 9:30,1.8,6.6
3,1,11,11,,2,2,71,2,25751.67,18,,7.77E-05,7.766486601,01-Jul,9:40:00,5,24-Jun,6,7,13,Camp,2019-07-01 9:30,1.8,6.6
3,1,12,12,50,2,2,71,2,25751.67,18,32,7.77E-05,7.766486601,01-Jul,9:40:00,5,24-Jun,6,7,13,Camp,2019-07-01 9:30,1.8,6.6
3,1,1,1,,1,1,105,1,25751.67,13,,3.88E-05,3.8832433,30-Jun,17:24:00,"5,10",24-Jun,6,6,12,Camp,2019-06-30 17:30,9,0
3,1,2,2,9,1,1,105,1,25751.67,13,-4,3.88E-05,3.8832433,30-Jun,17:24:00,"5,10",24-Jun,6,6,12,Camp,2019-06-30 17:30,9,0
3,1,3,3,13,1,1,105,1,25751.67,13,0,3.88E-05,3.8832433,30-Jun,17:24:00,"5,10",24-Jun,6,6,12,Camp,2019-06-30 17:30,9,0
3,1,4,4,10,1,1,105,1,25751.67,13,-3,3.88E-05,3.8832433,30-Jun,17:24:00,"5,10",24-Jun,6,6,12,Camp,2019-06-30 17:30,9,0
3,1,5,5,15,1,1,105,1,25751.67,13,2,3.88E-05,3.8832433,30-Jun,17:24:00,"5,10",24-Jun,6,6,12,Camp,2019-06-30 17:30,9,0
3,1,6,6,16,1,1,105,1,25751.67,13,3,3.88E-05,3.8832433,30-Jun,17:24:00,"5,10",24-Jun,6,6,12,Camp,2019-06-30 17:30,9,0
3,1,7,7,,1,1,105,1,25751.67,13,,3.88E-05,3.8832433,30-Jun,17:24:00,"5,10",24-Jun,6,6,12,Camp,2019-06-30 17:30,9,0
3,1,8,8,10,1,1,105,1,25751.67,13,-3,3.88E-05,3.8832433,30-Jun,17:24:00,"5,10",24-Jun,6,6,12,Camp,2019-06-30 17:30,9,0
3,1,9,9,9,1,1,105,1,25751.67,13,-4,3.88E-05,3.8832433,30-Jun,17:24:00,"5,10",24-Jun,6,6,12,Camp,2019-06-30 17:30,9,0
3,1,10,10,12,1,1,105,1,25751.67,13,-1,3.88E-05,3.8832433,30-Jun,17:24:00,"5,10",24-Jun,6,6,12,Camp,2019-06-30 17:30,9,0
3,1,11,11,9,1,1,105,1,25751.67,13,-4,3.88E-05,3.8832433,30-Jun,17:24:00,"5,10",24-Jun,6,6,12,Camp,2019-06-30 17:30,9,0
3,1,12,12,9,1,1,105,1,25751.67,13,-4,3.88E-05,3.8832433,30-Jun,17:24:00,"5,10",24-Jun,6,6,12,Camp,2019-06-30 17:30,9,0
3,1,1,1,,3,3,105,4,25751.67,18,,0.00015533,15.5329732,05-Jul,3:06:00,5,24-Jun,6,11,17,Camp,2019-07-05 3:00,1.1,0
3,1,2,2,,3,3,105,4,25751.67,18,,0.00015533,15.5329732,05-Jul,3:06:00,5,24-Jun,6,11,17,Camp,2019-07-05 3:00,1.1,0
3,1,3,3,58,3,3,105,4,25751.67,18,40,0.00015533,15.5329732,05-Jul,3:06:00,5,24-Jun,6,11,17,Camp,2019-07-05 3:00,1.1,0
3,1,4,4,,3,3,105,4,25751.67,18,,0.00015533,15.5329732,05-Jul,3:06:00,5,24-Jun,6,11,17,Camp,2019-07-05 3:00,1.1,0
3,1,5,5,,3,3,105,4,25751.67,18,,0.00015533,15.5329732,05-Jul,3:06:00,5,24-Jun,6,11,17,Camp,2019-07-05 3:00,1.1,0
3,1,6,6,50,3,3,105,4,25751.67,18,32,0.00015533,15.5329732,05-Jul,3:06:00,5,24-Jun,6,11,17,Camp,2019-07-05 3:00,1.1,0
3,1,7,7,39,3,3,105,4,25751.67,18,21,0.00015533,15.5329732,05-Jul,3:06:00,5,24-Jun,6,11,17,Camp,2019-07-05 3:00,1.1,0
3,1,8,8,38,3,3,105,4,25751.67,18,20,0.00015533,15.5329732,05-Jul,3:06:00,5,24-Jun,6,11,17,Camp,2019-07-05 3:00,1.1,0
3,1,9,9,44,3,3,105,4,25751.67,18,26,0.00015533,15.5329732,05-Jul,3:06:00,5,24-Jun,6,11,17,Camp,2019-07-05 3:00,1.1,0
3,1,10,10,44,3,3,105,4,25751.67,18,26,0.00015533,15.5329732,05-Jul,3:06:00,5,24-Jun,6,11,17,Camp,2019-07-05 3:00,1.1,0
3,1,11,11,45,3,3,105,4,25751.67,18,27,0.00015533,15.5329732,05-Jul,3:06:00,5,24-Jun,6,11,17,Camp,2019-07-05 3:00,1.1,0
3,1,12,12,46,3,3,105,4,25751.67,18,28,0.00015533,15.5329732,05-Jul,3:06:00,5,24-Jun,6,11,17,Camp,2019-07-05 3:00,1.1,0
4,1,1,1,19,4,1,12,12,5729.52,15,4,0.002094416,209.4415608,30-Jun,22:50:00,1,25-Jun,1,5,6,Pits,2019-06-30 23:00,3.3,5.2
4,1,2,2,13,4,1,12,12,5729.52,15,-2,0.002094416,209.4415608,30-Jun,22:50:00,1,25-Jun,1,5,6,Pits,2019-06-30 23:00,3.3,5.2
4,1,3,3,11,4,1,12,12,5729.52,15,-4,0.002094416,209.4415608,30-Jun,22:50:00,1,25-Jun,1,5,6,Pits,2019-06-30 23:00,3.3,5.2
4,1,4,4,11,4,1,12,12,5729.52,15,-4,0.002094416,209.4415608,30-Jun,22:50:00,1,25-Jun,1,5,6,Pits,2019-06-30 23:00,3.3,5.2
4,1,5,5,16,4,1,12,12,5729.52,15,1,0.002094416,209.4415608,30-Jun,22:50:00,1,25-Jun,1,5,6,Pits,2019-06-30 23:00,3.3,5.2
4,1,6,6,14,4,1,12,12,5729.52,15,-1,0.002094416,209.4415608,30-Jun,22:50:00,1,25-Jun,1,5,6,Pits,2019-06-30 23:00,3.3,5.2
4,1,7,7,17,4,1,12,12,5729.52,15,2,0.002094416,209.4415608,30-Jun,22:50:00,1,25-Jun,1,5,6,Pits,2019-06-30 23:00,3.3,5.2
4,1,8,8,16,4,1,12,12,5729.52,15,1,0.002094416,209.4415608,30-Jun,22:50:00,1,25-Jun,1,5,6,Pits,2019-06-30 23:00,3.3,5.2
4,1,9,9,14,4,1,12,12,5729.52,15,-1,0.002094416,209.4415608,30-Jun,22:50:00,1,25-Jun,1,5,6,Pits,2019-06-30 23:00,3.3,5.2
4,1,10,10,16,4,1,12,12,5729.52,15,1,0.002094416,209.4415608,30-Jun,22:50:00,1,25-Jun,1,5,6,Pits,2019-06-30 23:00,3.3,5.2
4,1,11,11,18,4,1,12,12,5729.52,15,3,0.002094416,209.4415608,30-Jun,22:50:00,1,25-Jun,1,5,6,Pits,2019-06-30 23:00,3.3,5.2
4,1,12,12,10,4,1,12,12,5729.52,15,-5,0.002094416,209.4415608,30-Jun,22:50:00,1,25-Jun,1,5,6,Pits,2019-06-30 23:00,3.3,5.2
4,1,1,1,17,5,2,119,7,5729.52,15,2,0.001221742,122.1742438,30-Jun,23:17:00,1,25-Jun,1,5,6,Pits,2019-06-30 23:30,2.8,4.9
4,1,2,2,15,5,2,119,7,5729.52,15,0,0.001221742,122.1742438,30-Jun,23:17:00,1,25-Jun,1,5,6,Pits,2019-06-30 23:30,2.8,4.9
4,1,3,3,17,5,2,119,7,5729.52,15,2,0.001221742,122.1742438,30-Jun,23:17:00,1,25-Jun,1,5,6,Pits,2019-06-30 23:30,2.8,4.9
4,1,4,4,17,5,2,119,7,5729.52,15,2,0.001221742,122.1742438,30-Jun,23:17:00,1,25-Jun,1,5,6,Pits,2019-06-30 23:30,2.8,4.9
4,1,5,5,16,5,2,119,7,5729.52,15,1,0.001221742,122.1742438,30-Jun,23:17:00,1,25-Jun,1,5,6,Pits,2019-06-30 23:30,2.8,4.9
4,1,6,6,16,5,2,119,7,5729.52,15,1,0.001221742,122.1742438,30-Jun,23:17:00,1,25-Jun,1,5,6,Pits,2019-06-30 23:30,2.8,4.9
4,1,7,7,17,5,2,119,7,5729.52,15,2,0.001221742,122.1742438,30-Jun,23:17:00,1,25-Jun,1,5,6,Pits,2019-06-30 23:30,2.8,4.9
4,1,8,8,17,5,2,119,7,5729.52,15,2,0.001221742,122.1742438,30-Jun,23:17:00,1,25-Jun,1,5,6,Pits,2019-06-30 23:30,2.8,4.9
4,1,9,9,,5,2,119,7,5729.52,15,,0.001221742,122.1742438,30-Jun,23:17:00,1,25-Jun,1,5,6,Pits,2019-06-30 23:30,2.8,4.9
4,1,10,10,,5,2,119,7,5729.52,15,,0.001221742,122.1742438,30-Jun,23:17:00,1,25-Jun,1,5,6,Pits,2019-06-30 23:30,2.8,4.9
4,1,11,11,,5,2,119,7,5729.52,15,,0.001221742,122.1742438,30-Jun,23:17:00,1,25-Jun,1,5,6,Pits,2019-06-30 23:30,2.8,4.9
4,1,12,12,17,5,2,119,7,5729.52,15,2,0.001221742,122.1742438,30-Jun,23:17:00,1,25-Jun,1,5,6,Pits,2019-06-30 23:30,2.8,4.9
4,2,1,13,,5,2,121,7,5729.52,15,,0.001221742,122.1742438,30-Jun,23:22:00,5,25-Jun,1,5,6,Pits,2019-06-30 23:30,2.8,4.9
4,2,2,14,15,5,2,121,7,5729.52,15,0,0.001221742,122.1742438,30-Jun,23:22:00,5,25-Jun,1,5,6,Pits,2019-06-30 23:30,2.8,4.9
4,2,3,15,,5,2,121,7,5729.52,15,,0.001221742,122.1742438,30-Jun,23:22:00,5,25-Jun,1,5,6,Pits,2019-06-30 23:30,2.8,4.9
4,2,4,16,16,5,2,121,7,5729.52,15,1,0.001221742,122.1742438,30-Jun,23:22:00,5,25-Jun,1,5,6,Pits,2019-06-30 23:30,2.8,4.9
4,2,5,17,16,5,2,121,7,5729.52,15,1,0.001221742,122.1742438,30-Jun,23:22:00,5,25-Jun,1,5,6,Pits,2019-06-30 23:30,2.8,4.9
4,2,6,18,14,5,2,121,7,5729.52,15,-1,0.001221742,122.1742438,30-Jun,23:22:00,5,25-Jun,1,5,6,Pits,2019-06-30 23:30,2.8,4.9
4,2,7,19,16,5,2,121,7,5729.52,15,1,0.001221742,122.1742438,30-Jun,23:22:00,5,25-Jun,1,5,6,Pits,2019-06-30 23:30,2.8,4.9
4,2,8,20,15,5,2,121,7,5729.52,15,0,0.001221742,122.1742438,30-Jun,23:22:00,5,25-Jun,1,5,6,Pits,2019-06-30 23:30,2.8,4.9
4,2,9,21,17,5,2,121,7,5729.52,15,2,0.001221742,122.1742438,30-Jun,23:22:00,5,25-Jun,1,5,6,Pits,2019-06-30 23:30,2.8,4.9
4,2,10,22,17,5,2,121,7,5729.52,15,2,0.001221742,122.1742438,30-Jun,23:22:00,5,25-Jun,1,5,6,Pits,2019-06-30 23:30,2.8,4.9
4,2,11,23,17,5,2,121,7,5729.52,15,2,0.001221742,122.1742438,30-Jun,23:22:00,5,25-Jun,1,5,6,Pits,2019-06-30 23:30,2.8,4.9
4,2,12,24,19,5,2,121,7,5729.52,15,4,0.001221742,122.1742438,30-Jun,23:22:00,5,25-Jun,1,5,6,Pits,2019-06-30 23:30,2.8,4.9
5,1,1,1,17,6,1,104,2,10983.42,17,0,0.000182093,18.20926369,01-Jul,9:40:00,5,25-Jun,2,6,8,Camp,2019-07-01 9:30,1.8,6.6
5,1,2,2,19,6,1,104,2,10983.42,17,2,0.000182093,18.20926369,01-Jul,9:40:00,5,25-Jun,2,6,8,Camp,2019-07-01 9:30,1.8,6.6
5,1,3,3,16,6,1,104,2,10983.42,17,-1,0.000182093,18.20926369,01-Jul,9:40:00,5,25-Jun,2,6,8,Camp,2019-07-01 9:30,1.8,6.6
5,1,4,4,30,6,1,104,2,10983.42,17,13,0.000182093,18.20926369,01-Jul,9:40:00,5,25-Jun,2,6,8,Camp,2019-07-01 9:30,1.8,6.6
5,1,5,5,,6,1,104,2,10983.42,17,,0.000182093,18.20926369,01-Jul,9:40:00,5,25-Jun,2,6,8,Camp,2019-07-01 9:30,1.8,6.6
5,1,6,6,,6,1,104,2,10983.42,17,,0.000182093,18.20926369,01-Jul,9:40:00,5,25-Jun,2,6,8,Camp,2019-07-01 9:30,1.8,6.6
5,1,7,7,,6,1,104,2,10983.42,17,,0.000182093,18.20926369,01-Jul,9:40:00,5,25-Jun,2,6,8,Camp,2019-07-01 9:30,1.8,6.6
5,1,8,8,,6,1,104,2,10983.42,17,,0.000182093,18.20926369,01-Jul,9:40:00,5,25-Jun,2,6,8,Camp,2019-07-01 9:30,1.8,6.6
5,1,9,9,,6,1,104,2,10983.42,17,,0.000182093,18.20926369,01-Jul,9:40:00,5,25-Jun,2,6,8,Camp,2019-07-01 9:30,1.8,6.6
5,1,10,10,,6,1,104,2,10983.42,17,,0.000182093,18.20926369,01-Jul,9:40:00,5,25-Jun,2,6,8,Camp,2019-07-01 9:30,1.8,6.6
5,1,11,11,,6,1,104,2,10983.42,17,,0.000182093,18.20926369,01-Jul,9:40:00,5,25-Jun,2,6,8,Camp,2019-07-01 9:30,1.8,6.6
5,1,12,12,,6,1,104,2,10983.42,17,,0.000182093,18.20926369,01-Jul,9:40:00,5,25-Jun,2,6,8,Camp,2019-07-01 9:30,1.8,6.6
6,1,1,1,,7,1,17,2,27857.62,15,,7.18E-05,7.179365454,01-Jul,9:40:00,5,25-Jun,1,6,7,Camp,2019-07-01 9:30,1.8,6.6
6,1,2,2,36,7,1,17,2,27857.62,15,21,7.18E-05,7.179365454,01-Jul,9:40:00,5,25-Jun,1,6,7,Camp,2019-07-01 9:30,1.8,6.6
6,1,3,3,36,7,1,17,2,27857.62,15,21,7.18E-05,7.179365454,01-Jul,9:40:00,5,25-Jun,1,6,7,Camp,2019-07-01 9:30,1.8,6.6
6,1,4,4,35,7,1,17,2,27857.62,15,20,7.18E-05,7.179365454,01-Jul,9:40:00,5,25-Jun,1,6,7,Camp,2019-07-01 9:30,1.8,6.6
6,1,5,5,35,7,1,17,2,27857.62,15,20,7.18E-05,7.179365454,01-Jul,9:40:00,5,25-Jun,1,6,7,Camp,2019-07-01 9:30,1.8,6.6
6,1,6,6,32,7,1,17,2,27857.62,15,17,7.18E-05,7.179365454,01-Jul,9:40:00,5,25-Jun,1,6,7,Camp,2019-07-01 9:30,1.8,6.6
6,1,7,7,28,7,1,17,2,27857.62,15,13,7.18E-05,7.179365454,01-Jul,9:40:00,5,25-Jun,1,6,7,Camp,2019-07-01 9:30,1.8,6.6
6,1,8,8,27,7,1,17,2,27857.62,15,12,7.18E-05,7.179365454,01-Jul,9:40:00,5,25-Jun,1,6,7,Camp,2019-07-01 9:30,1.8,6.6
6,1,9,9,27,7,1,17,2,27857.62,15,12,7.18E-05,7.179365454,01-Jul,9:40:00,5,25-Jun,1,6,7,Camp,2019-07-01 9:30,1.8,6.6
6,1,10,10,33,7,1,17,2,27857.62,15,18,7.18E-05,7.179365454,01-Jul,9:40:00,5,25-Jun,1,6,7,Camp,2019-07-01 9:30,1.8,6.6
6,1,11,11,26,7,1,17,2,27857.62,15,11,7.18E-05,7.179365454,01-Jul,9:40:00,5,25-Jun,1,6,7,Camp,2019-07-01 9:30,1.8,6.6
6,1,12,12,22,7,1,17,2,27857.62,15,7,7.18E-05,7.179365454,01-Jul,9:40:00,5,25-Jun,1,6,7,Camp,2019-07-01 9:30,1.8,6.6
6,1,1,1,10,8,2,160,1,27857.62,16,-6,3.59E-05,3.589682727,02-Jul,13:26:00,1,25-Jun,1,7,8,Camp,2019-07-02 13:30,2,3.6
6,1,2,2,12,8,2,160,1,27857.62,16,-4,3.59E-05,3.589682727,02-Jul,13:26:00,1,25-Jun,1,7,8,Camp,2019-07-02 13:30,2,3.6
6,1,3,3,12,8,2,160,1,27857.62,16,-4,3.59E-05,3.589682727,02-Jul,13:26:00,1,25-Jun,1,7,8,Camp,2019-07-02 13:30,2,3.6
6,1,4,4,13,8,2,160,1,27857.62,16,-3,3.59E-05,3.589682727,02-Jul,13:26:00,1,25-Jun,1,7,8,Camp,2019-07-02 13:30,2,3.6
6,1,5,5,13,8,2,160,1,27857.62,16,-3,3.59E-05,3.589682727,02-Jul,13:26:00,1,25-Jun,1,7,8,Camp,2019-07-02 13:30,2,3.6
6,1,6,6,27,8,2,160,1,27857.62,16,11,3.59E-05,3.589682727,02-Jul,13:26:00,1,25-Jun,1,7,8,Camp,2019-07-02 13:30,2,3.6
6,1,7,7,35,8,2,160,1,27857.62,16,19,3.59E-05,3.589682727,02-Jul,13:26:00,1,25-Jun,1,7,8,Camp,2019-07-02 13:30,2,3.6
6,1,8,8,26,8,2,160,1,27857.62,16,10,3.59E-05,3.589682727,02-Jul,13:26:00,1,25-Jun,1,7,8,Camp,2019-07-02 13:30,2,3.6
6,1,9,9,24,8,2,160,1,27857.62,16,8,3.59E-05,3.589682727,02-Jul,13:26:00,1,25-Jun,1,7,8,Camp,2019-07-02 13:30,2,3.6
6,1,10,10,41,8,2,160,1,27857.62,16,25,3.59E-05,3.589682727,02-Jul,13:26:00,1,25-Jun,1,7,8,Camp,2019-07-02 13:30,2,3.6
6,1,11,11,31,8,2,160,1,27857.62,16,15,3.59E-05,3.589682727,02-Jul,13:26:00,1,25-Jun,1,7,8,Camp,2019-07-02 13:30,2,3.6
6,1,12,12,31,8,2,160,1,27857.62,16,15,3.59E-05,3.589682727,02-Jul,13:26:00,1,25-Jun,1,7,8,Camp,2019-07-02 13:30,2,3.6
6,1,1,1,13,9,3,139.2,2,27857.62,12,1,7.18E-05,7.179365454,04-Jul,10:07:00,5,25-Jun,1,9,10,Camp,2019-07-04 10:00,3.4,3.5
6,1,2,2,,9,3,139.2,2,27857.62,12,,7.18E-05,7.179365454,04-Jul,10:07:00,5,25-Jun,1,9,10,Camp,2019-07-04 10:00,3.4,3.5
6,1,3,3,,9,3,139.2,2,27857.62,12,,7.18E-05,7.179365454,04-Jul,10:07:00,5,25-Jun,1,9,10,Camp,2019-07-04 10:00,3.4,3.5
6,1,4,4,17,9,3,139.2,2,27857.62,12,5,7.18E-05,7.179365454,04-Jul,10:07:00,5,25-Jun,1,9,10,Camp,2019-07-04 10:00,3.4,3.5
6,1,5,5,18,9,3,139.2,2,27857.62,12,6,7.18E-05,7.179365454,04-Jul,10:07:00,5,25-Jun,1,9,10,Camp,2019-07-04 10:00,3.4,3.5
6,1,6,6,,9,3,139.2,2,27857.62,12,,7.18E-05,7.179365454,04-Jul,10:07:00,5,25-Jun,1,9,10,Camp,2019-07-04 10:00,3.4,3.5
6,1,7,7,19,9,3,139.2,2,27857.62,12,7,7.18E-05,7.179365454,04-Jul,10:07:00,5,25-Jun,1,9,10,Camp,2019-07-04 10:00,3.4,3.5
6,1,8,8,18,9,3,139.2,2,27857.62,12,6,7.18E-05,7.179365454,04-Jul,10:07:00,5,25-Jun,1,9,10,Camp,2019-07-04 10:00,3.4,3.5
6,1,9,9,,9,3,139.2,2,27857.62,12,,7.18E-05,7.179365454,04-Jul,10:07:00,5,25-Jun,1,9,10,Camp,2019-07-04 10:00,3.4,3.5
6,1,10,10,17,9,3,139.2,2,27857.62,12,5,7.18E-05,7.179365454,04-Jul,10:07:00,5,25-Jun,1,9,10,Camp,2019-07-04 10:00,3.4,3.5
6,1,11,11,14,9,3,139.2,2,27857.62,12,2,7.18E-05,7.179365454,04-Jul,10:07:00,5,25-Jun,1,9,10,Camp,2019-07-04 10:00,3.4,3.5
6,1,12,12,17,9,3,139.2,2,27857.62,12,5,7.18E-05,7.179365454,04-Jul,10:07:00,5,25-Jun,1,9,10,Camp,2019-07-04 10:00,3.4,3.5
7,1,1,1,7,10,1,115,2,21869.08,13,-6,9.15E-05,9.145331581,30-Jun,15:56:00,1,25-Jun,13,5,18,Beach,2019-06-30 16:00,6.4,2.5
7,1,2,2,10,10,1,115,2,21869.08,13,-3,9.15E-05,9.145331581,30-Jun,15:56:00,1,25-Jun,13,5,18,Beach,2019-06-30 16:00,6.4,2.5
7,1,3,3,7,10,1,115,2,21869.08,13,-6,9.15E-05,9.145331581,30-Jun,15:56:00,1,25-Jun,13,5,18,Beach,2019-06-30 16:00,6.4,2.5
7,1,4,4,8,10,1,115,2,21869.08,13,-5,9.15E-05,9.145331581,30-Jun,15:56:00,1,25-Jun,13,5,18,Beach,2019-06-30 16:00,6.4,2.5
7,1,5,5,10,10,1,115,2,21869.08,13,-3,9.15E-05,9.145331581,30-Jun,15:56:00,1,25-Jun,13,5,18,Beach,2019-06-30 16:00,6.4,2.5
7,1,6,6,9,10,1,115,2,21869.08,13,-4,9.15E-05,9.145331581,30-Jun,15:56:00,1,25-Jun,13,5,18,Beach,2019-06-30 16:00,6.4,2.5
7,1,7,7,7,10,1,115,2,21869.08,13,-6,9.15E-05,9.145331581,30-Jun,15:56:00,1,25-Jun,13,5,18,Beach,2019-06-30 16:00,6.4,2.5
7,1,8,8,9,10,1,115,2,21869.08,13,-4,9.15E-05,9.145331581,30-Jun,15:56:00,1,25-Jun,13,5,18,Beach,2019-06-30 16:00,6.4,2.5
7,1,9,9,14,10,1,115,2,21869.08,13,1,9.15E-05,9.145331581,30-Jun,15:56:00,1,25-Jun,13,5,18,Beach,2019-06-30 16:00,6.4,2.5
7,1,10,10,12,10,1,115,2,21869.08,13,-1,9.15E-05,9.145331581,30-Jun,15:56:00,1,25-Jun,13,5,18,Beach,2019-06-30 16:00,6.4,2.5
7,1,11,11,12,10,1,115,2,21869.08,13,-1,9.15E-05,9.145331581,30-Jun,15:56:00,1,25-Jun,13,5,18,Beach,2019-06-30 16:00,6.4,2.5
7,1,12,12,13,10,1,115,2,21869.08,13,0,9.15E-05,9.145331581,30-Jun,15:56:00,1,25-Jun,13,5,18,Beach,2019-06-30 16:00,6.4,2.5
7,1,1,1,16,11,2,111.5,14,21869.08,15,1,0.000640173,64.01732107,30-Jun,22:48:00,1,25-Jun,13,5,18,Beach,2019-06-30 23:00,3,5.3
7,1,2,2,15,11,2,111.5,14,21869.08,15,0,0.000640173,64.01732107,30-Jun,22:48:00,1,25-Jun,13,5,18,Beach,2019-06-30 23:00,3,5.3
7,1,3,3,16,11,2,111.5,14,21869.08,15,1,0.000640173,64.01732107,30-Jun,22:48:00,1,25-Jun,13,5,18,Beach,2019-06-30 23:00,3,5.3
7,1,4,4,15,11,2,111.5,14,21869.08,15,0,0.000640173,64.01732107,30-Jun,22:48:00,1,25-Jun,13,5,18,Beach,2019-06-30 23:00,3,5.3
7,1,5,5,17,11,2,111.5,14,21869.08,15,2,0.000640173,64.01732107,30-Jun,22:48:00,1,25-Jun,13,5,18,Beach,2019-06-30 23:00,3,5.3
7,1,6,6,16,11,2,111.5,14,21869.08,15,1,0.000640173,64.01732107,30-Jun,22:48:00,1,25-Jun,13,5,18,Beach,2019-06-30 23:00,3,5.3
7,1,7,7,15,11,2,111.5,14,21869.08,15,0,0.000640173,64.01732107,30-Jun,22:48:00,1,25-Jun,13,5,18,Beach,2019-06-30 23:00,3,5.3
7,1,8,8,18,11,2,111.5,14,21869.08,15,3,0.000640173,64.01732107,30-Jun,22:48:00,1,25-Jun,13,5,18,Beach,2019-06-30 23:00,3,5.3
7,1,9,9,17,11,2,111.5,14,21869.08,15,2,0.000640173,64.01732107,30-Jun,22:48:00,1,25-Jun,13,5,18,Beach,2019-06-30 23:00,3,5.3
7,1,10,10,17,11,2,111.5,14,21869.08,15,2,0.000640173,64.01732107,30-Jun,22:48:00,1,25-Jun,13,5,18,Beach,2019-06-30 23:00,3,5.3
7,1,11,11,13,11,2,111.5,14,21869.08,15,-2,0.000640173,64.01732107,30-Jun,22:48:00,1,25-Jun,13,5,18,Beach,2019-06-30 23:00,3,5.3
7,1,12,12,14,11,2,111.5,14,21869.08,15,-1,0.000640173,64.01732107,30-Jun,22:48:00,1,25-Jun,13,5,18,Beach,2019-06-30 23:00,3,5.3
7,2,1,13,15,11,2,102,14,21869.08,15,0,0.000640173,64.01732107,30-Jun,22:54:00,1,25-Jun,13,5,18,Beach,2019-06-30 23:00,3,5.3
7,2,2,14,16,11,2,102,14,21869.08,15,1,0.000640173,64.01732107,30-Jun,22:54:00,1,25-Jun,13,5,18,Beach,2019-06-30 23:00,3,5.3
7,2,3,15,14,11,2,102,14,21869.08,15,-1,0.000640173,64.01732107,30-Jun,22:54:00,1,25-Jun,13,5,18,Beach,2019-06-30 23:00,3,5.3
7,2,4,16,14,11,2,102,14,21869.08,15,-1,0.000640173,64.01732107,30-Jun,22:54:00,1,25-Jun,13,5,18,Beach,2019-06-30 23:00,3,5.3
7,2,5,17,16,11,2,102,14,21869.08,15,1,0.000640173,64.01732107,30-Jun,22:54:00,1,25-Jun,13,5,18,Beach,2019-06-30 23:00,3,5.3
7,2,6,18,15,11,2,102,14,21869.08,15,0,0.000640173,64.01732107,30-Jun,22:54:00,1,25-Jun,13,5,18,Beach,2019-06-30 23:00,3,5.3
7,2,7,19,,11,2,102,14,21869.08,15,,0.000640173,64.01732107,30-Jun,22:54:00,1,25-Jun,13,5,18,Beach,2019-06-30 23:00,3,5.3
7,2,8,20,17,11,2,102,14,21869.08,15,2,0.000640173,64.01732107,30-Jun,22:54:00,1,25-Jun,13,5,18,Beach,2019-06-30 23:00,3,5.3
7,2,9,21,17,11,2,102,14,21869.08,15,2,0.000640173,64.01732107,30-Jun,22:54:00,1,25-Jun,13,5,18,Beach,2019-06-30 23:00,3,5.3
7,2,10,22,16,11,2,102,14,21869.08,15,1,0.000640173,64.01732107,30-Jun,22:54:00,1,25-Jun,13,5,18,Beach,2019-06-30 23:00,3,5.3
7,2,11,23,16,11,2,102,14,21869.08,15,1,0.000640173,64.01732107,30-Jun,22:54:00,1,25-Jun,13,5,18,Beach,2019-06-30 23:00,3,5.3
7,2,12,24,13,11,2,102,14,21869.08,15,-2,0.000640173,64.01732107,30-Jun,22:54:00,1,25-Jun,13,5,18,Beach,2019-06-30 23:00,3,5.3
7,3,1,25,17,11,2,88.25,14,21869.08,15,2,0.000640173,64.01732107,30-Jun,22:58:00,1,25-Jun,13,5,18,Beach,2019-06-30 23:00,3,5.3
7,3,2,26,13,11,2,88.25,14,21869.08,15,-2,0.000640173,64.01732107,30-Jun,22:58:00,1,25-Jun,13,5,18,Beach,2019-06-30 23:00,3,5.3
7,3,3,27,17,11,2,88.25,14,21869.08,15,2,0.000640173,64.01732107,30-Jun,22:58:00,1,25-Jun,13,5,18,Beach,2019-06-30 23:00,3,5.3
7,3,4,28,14,11,2,88.25,14,21869.08,15,-1,0.000640173,64.01732107,30-Jun,22:58:00,1,25-Jun,13,5,18,Beach,2019-06-30 23:00,3,5.3
7,3,5,29,12,11,2,88.25,14,21869.08,15,-3,0.000640173,64.01732107,30-Jun,22:58:00,1,25-Jun,13,5,18,Beach,2019-06-30 23:00,3,5.3
7,3,6,30,11,11,2,88.25,14,21869.08,15,-4,0.000640173,64.01732107,30-Jun,22:58:00,1,25-Jun,13,5,18,Beach,2019-06-30 23:00,3,5.3
7,3,7,31,13,11,2,88.25,14,21869.08,15,-2,0.000640173,64.01732107,30-Jun,22:58:00,1,25-Jun,13,5,18,Beach,2019-06-30 23:00,3,5.3
7,3,8,32,13,11,2,88.25,14,21869.08,15,-2,0.000640173,64.01732107,30-Jun,22:58:00,1,25-Jun,13,5,18,Beach,2019-06-30 23:00,3,5.3
7,3,9,33,13,11,2,88.25,14,21869.08,15,-2,0.000640173,64.01732107,30-Jun,22:58:00,1,25-Jun,13,5,18,Beach,2019-06-30 23:00,3,5.3
7,3,10,34,15,11,2,88.25,14,21869.08,15,0,0.000640173,64.01732107,30-Jun,22:58:00,1,25-Jun,13,5,18,Beach,2019-06-30 23:00,3,5.3
7,3,11,35,11,11,2,88.25,14,21869.08,15,-4,0.000640173,64.01732107,30-Jun,22:58:00,1,25-Jun,13,5,18,Beach,2019-06-30 23:00,3,5.3
7,3,12,36,10,11,2,88.25,14,21869.08,15,-5,0.000640173,64.01732107,30-Jun,22:58:00,1,25-Jun,13,5,18,Beach,2019-06-30 23:00,3,5.3
7,1,1,1,14,12,3,113,4,21869.08,18,-4,0.000182907,18.29066316,01-Jul,7:08:00,1,25-Jun,13,6,19,Beach,2019-07-01 7:00,2,7.3
7,1,2,2,16,12,3,113,4,21869.08,18,-2,0.000182907,18.29066316,01-Jul,7:08:00,1,25-Jun,13,6,19,Beach,2019-07-01 7:00,2,7.3
7,1,3,3,15,12,3,113,4,21869.08,18,-3,0.000182907,18.29066316,01-Jul,7:08:00,1,25-Jun,13,6,19,Beach,2019-07-01 7:00,2,7.3
7,1,4,4,15,12,3,113,4,21869.08,18,-3,0.000182907,18.29066316,01-Jul,7:08:00,1,25-Jun,13,6,19,Beach,2019-07-01 7:00,2,7.3
7,1,5,5,15,12,3,113,4,21869.08,18,-3,0.000182907,18.29066316,01-Jul,7:08:00,1,25-Jun,13,6,19,Beach,2019-07-01 7:00,2,7.3
7,1,6,6,15,12,3,113,4,21869.08,18,-3,0.000182907,18.29066316,01-Jul,7:08:00,1,25-Jun,13,6,19,Beach,2019-07-01 7:00,2,7.3
7,1,7,7,14,12,3,113,4,21869.08,18,-4,0.000182907,18.29066316,01-Jul,7:08:00,1,25-Jun,13,6,19,Beach,2019-07-01 7:00,2,7.3
7,1,8,8,15,12,3,113,4,21869.08,18,-3,0.000182907,18.29066316,01-Jul,7:08:00,1,25-Jun,13,6,19,Beach,2019-07-01 7:00,2,7.3
7,1,9,9,12,12,3,113,4,21869.08,18,-6,0.000182907,18.29066316,01-Jul,7:08:00,1,25-Jun,13,6,19,Beach,2019-07-01 7:00,2,7.3
7,1,10,10,13,12,3,113,4,21869.08,18,-5,0.000182907,18.29066316,01-Jul,7:08:00,1,25-Jun,13,6,19,Beach,2019-07-01 7:00,2,7.3
7,1,11,11,11,12,3,113,4,21869.08,18,-7,0.000182907,18.29066316,01-Jul,7:08:00,1,25-Jun,13,6,19,Beach,2019-07-01 7:00,2,7.3
7,1,12,12,13,12,3,113,4,21869.08,18,-5,0.000182907,18.29066316,01-Jul,7:08:00,1,25-Jun,13,6,19,Beach,2019-07-01 7:00,2,7.3
7,2,1,13,16,12,3,111,4,21869.08,18,-2,0.000182907,18.29066316,01-Jul,7:11:00,1,25-Jun,13,6,19,Beach,2019-07-01 7:00,2,7.3
7,2,2,14,14,12,3,111,4,21869.08,18,-4,0.000182907,18.29066316,01-Jul,7:11:00,1,25-Jun,13,6,19,Beach,2019-07-01 7:00,2,7.3
7,2,3,15,14,12,3,111,4,21869.08,18,-4,0.000182907,18.29066316,01-Jul,7:11:00,1,25-Jun,13,6,19,Beach,2019-07-01 7:00,2,7.3
7,2,4,16,15,12,3,111,4,21869.08,18,-3,0.000182907,18.29066316,01-Jul,7:11:00,1,25-Jun,13,6,19,Beach,2019-07-01 7:00,2,7.3
7,2,5,17,13,12,3,111,4,21869.08,18,-5,0.000182907,18.29066316,01-Jul,7:11:00,1,25-Jun,13,6,19,Beach,2019-07-01 7:00,2,7.3
7,2,6,18,15,12,3,111,4,21869.08,18,-3,0.000182907,18.29066316,01-Jul,7:11:00,1,25-Jun,13,6,19,Beach,2019-07-01 7:00,2,7.3
7,2,7,19,14,12,3,111,4,21869.08,18,-4,0.000182907,18.29066316,01-Jul,7:11:00,1,25-Jun,13,6,19,Beach,2019-07-01 7:00,2,7.3
7,2,8,20,15,12,3,111,4,21869.08,18,-3,0.000182907,18.29066316,01-Jul,7:11:00,1,25-Jun,13,6,19,Beach,2019-07-01 7:00,2,7.3
7,2,9,21,14,12,3,111,4,21869.08,18,-4,0.000182907,18.29066316,01-Jul,7:11:00,1,25-Jun,13,6,19,Beach,2019-07-01 7:00,2,7.3
7,2,10,22,18,12,3,111,4,21869.08,18,0,0.000182907,18.29066316,01-Jul,7:11:00,1,25-Jun,13,6,19,Beach,2019-07-01 7:00,2,7.3
7,2,11,23,,12,3,111,4,21869.08,18,,0.000182907,18.29066316,01-Jul,7:11:00,1,25-Jun,13,6,19,Beach,2019-07-01 7:00,2,7.3
7,2,12,24,,12,3,111,4,21869.08,18,,0.000182907,18.29066316,01-Jul,7:11:00,1,25-Jun,13,6,19,Beach,2019-07-01 7:00,2,7.3
8,1,1,1,16,13,1,193.5,7,6251.88,16,0,0.001119663,111.9662683,30-Jun,22:48:00,1,25-Jun,7,5,12,Beach,2019-06-30 23:00,3,5.3
8,1,2,2,17,13,1,193.5,7,6251.88,16,1,0.001119663,111.9662683,30-Jun,22:48:00,1,25-Jun,7,5,12,Beach,2019-06-30 23:00,3,5.3
8,1,3,3,,13,1,193.5,7,6251.88,16,,0.001119663,111.9662683,30-Jun,22:48:00,1,25-Jun,7,5,12,Beach,2019-06-30 23:00,3,5.3
8,1,4,4,16,13,1,193.5,7,6251.88,16,0,0.001119663,111.9662683,30-Jun,22:48:00,1,25-Jun,7,5,12,Beach,2019-06-30 23:00,3,5.3
8,1,5,5,17,13,1,193.5,7,6251.88,16,1,0.001119663,111.9662683,30-Jun,22:48:00,1,25-Jun,7,5,12,Beach,2019-06-30 23:00,3,5.3
8,1,6,6,16,13,1,193.5,7,6251.88,16,0,0.001119663,111.9662683,30-Jun,22:48:00,1,25-Jun,7,5,12,Beach,2019-06-30 23:00,3,5.3
8,1,7,7,16,13,1,193.5,7,6251.88,16,0,0.001119663,111.9662683,30-Jun,22:48:00,1,25-Jun,7,5,12,Beach,2019-06-30 23:00,3,5.3
8,1,8,8,17,13,1,193.5,7,6251.88,16,1,0.001119663,111.9662683,30-Jun,22:48:00,1,25-Jun,7,5,12,Beach,2019-06-30 23:00,3,5.3
8,1,9,9,18,13,1,193.5,7,6251.88,16,2,0.001119663,111.9662683,30-Jun,22:48:00,1,25-Jun,7,5,12,Beach,2019-06-30 23:00,3,5.3
8,1,10,10,19,13,1,193.5,7,6251.88,16,3,0.001119663,111.9662683,30-Jun,22:48:00,1,25-Jun,7,5,12,Beach,2019-06-30 23:00,3,5.3
8,1,11,11,,13,1,193.5,7,6251.88,16,,0.001119663,111.9662683,30-Jun,22:48:00,1,25-Jun,7,5,12,Beach,2019-06-30 23:00,3,5.3
8,1,12,12,18,13,1,193.5,7,6251.88,16,2,0.001119663,111.9662683,30-Jun,22:48:00,1,25-Jun,7,5,12,Beach,2019-06-30 23:00,3,5.3
8,2,1,13,18,13,1,182,7,6251.88,16,2,0.001119663,111.9662683,30-Jun,22:54:00,1,25-Jun,7,5,12,Beach,2019-06-30 23:00,3,5.3
8,2,2,14,18,13,1,182,7,6251.88,16,2,0.001119663,111.9662683,30-Jun,22:54:00,1,25-Jun,7,5,12,Beach,2019-06-30 23:00,3,5.3
8,2,3,15,19,13,1,182,7,6251.88,16,3,0.001119663,111.9662683,30-Jun,22:54:00,1,25-Jun,7,5,12,Beach,2019-06-30 23:00,3,5.3
8,2,4,16,18,13,1,182,7,6251.88,16,2,0.001119663,111.9662683,30-Jun,22:54:00,1,25-Jun,7,5,12,Beach,2019-06-30 23:00,3,5.3
8,2,5,17,18,13,1,182,7,6251.88,16,2,0.001119663,111.9662683,30-Jun,22:54:00,1,25-Jun,7,5,12,Beach,2019-06-30 23:00,3,5.3
8,2,6,18,17,13,1,182,7,6251.88,16,1,0.001119663,111.9662683,30-Jun,22:54:00,1,25-Jun,7,5,12,Beach,2019-06-30 23:00,3,5.3
8,2,7,19,17,13,1,182,7,6251.88,16,1,0.001119663,111.9662683,30-Jun,22:54:00,1,25-Jun,7,5,12,Beach,2019-06-30 23:00,3,5.3
8,2,8,20,26,13,1,182,7,6251.88,16,10,0.001119663,111.9662683,30-Jun,22:54:00,1,25-Jun,7,5,12,Beach,2019-06-30 23:00,3,5.3
8,2,9,21,44,13,1,182,7,6251.88,16,28,0.001119663,111.9662683,30-Jun,22:54:00,1,25-Jun,7,5,12,Beach,2019-06-30 23:00,3,5.3
8,2,10,22,31,13,1,182,7,6251.88,16,15,0.001119663,111.9662683,30-Jun,22:54:00,1,25-Jun,7,5,12,Beach,2019-06-30 23:00,3,5.3
8,2,11,23,,13,1,182,7,6251.88,16,,0.001119663,111.9662683,30-Jun,22:54:00,1,25-Jun,7,5,12,Beach,2019-06-30 23:00,3,5.3
8,2,12,24,,13,1,182,7,6251.88,16,,0.001119663,111.9662683,30-Jun,22:54:00,1,25-Jun,7,5,12,Beach,2019-06-30 23:00,3,5.3
8,1,1,1,28,14,2,41,2,6251.88,30,-2,0.000319904,31.99036236,05-Jul,2:27:00,1,25-Jun,7,10,17,Beach,2019-07-05 2:30,1.8,2.1
8,1,2,2,27,14,2,41,2,6251.88,30,-3,0.000319904,31.99036236,05-Jul,2:27:00,1,25-Jun,7,10,17,Beach,2019-07-05 2:30,1.8,2.1
8,1,3,3,30,14,2,41,2,6251.88,30,0,0.000319904,31.99036236,05-Jul,2:27:00,1,25-Jun,7,10,17,Beach,2019-07-05 2:30,1.8,2.1
8,1,4,4,32,14,2,41,2,6251.88,30,2,0.000319904,31.99036236,05-Jul,2:27:00,1,25-Jun,7,10,17,Beach,2019-07-05 2:30,1.8,2.1
8,1,5,5,28,14,2,41,2,6251.88,30,-2,0.000319904,31.99036236,05-Jul,2:27:00,1,25-Jun,7,10,17,Beach,2019-07-05 2:30,1.8,2.1
8,1,6,6,27,14,2,41,2,6251.88,30,-3,0.000319904,31.99036236,05-Jul,2:27:00,1,25-Jun,7,10,17,Beach,2019-07-05 2:30,1.8,2.1
8,1,7,7,,14,2,41,2,6251.88,30,,0.000319904,31.99036236,05-Jul,2:27:00,1,25-Jun,7,10,17,Beach,2019-07-05 2:30,1.8,2.1
8,1,8,8,,14,2,41,2,6251.88,30,,0.000319904,31.99036236,05-Jul,2:27:00,1,25-Jun,7,10,17,Beach,2019-07-05 2:30,1.8,2.1
8,1,9,9,32,14,2,41,2,6251.88,30,2,0.000319904,31.99036236,05-Jul,2:27:00,1,25-Jun,7,10,17,Beach,2019-07-05 2:30,1.8,2.1
8,1,10,10,31,14,2,41,2,6251.88,30,1,0.000319904,31.99036236,05-Jul,2:27:00,1,25-Jun,7,10,17,Beach,2019-07-05 2:30,1.8,2.1
8,1,11,11,26,14,2,41,2,6251.88,30,-4,0.000319904,31.99036236,05-Jul,2:27:00,1,25-Jun,7,10,17,Beach,2019-07-05 2:30,1.8,2.1
8,1,12,12,,14,2,41,2,6251.88,30,,0.000319904,31.99036236,05-Jul,2:27:00,1,25-Jun,7,10,17,Beach,2019-07-05 2:30,1.8,2.1
10,1,1,1,,15,1,145.33,2,19502.48,13,,0.000102551,10.25510384,30-Jun,15:57:00,"1,5",28-Jun,2,2,4,Pits,2019-06-30 16:00,8,3.6
10,1,2,2,45,15,1,145.33,2,19502.48,13,32,0.000102551,10.25510384,30-Jun,15:57:00,"1,5",28-Jun,2,2,4,Pits,2019-06-30 16:00,8,3.6
10,1,3,3,,15,1,145.33,2,19502.48,13,,0.000102551,10.25510384,30-Jun,15:57:00,"1,5",28-Jun,2,2,4,Pits,2019-06-30 16:00,8,3.6
10,1,4,4,,15,1,145.33,2,19502.48,13,,0.000102551,10.25510384,30-Jun,15:57:00,"1,5",28-Jun,2,2,4,Pits,2019-06-30 16:00,8,3.6
10,1,5,5,26,15,1,145.33,2,19502.48,13,13,0.000102551,10.25510384,30-Jun,15:57:00,"1,5",28-Jun,2,2,4,Pits,2019-06-30 16:00,8,3.6
10,1,6,6,26,15,1,145.33,2,19502.48,13,13,0.000102551,10.25510384,30-Jun,15:57:00,"1,5",28-Jun,2,2,4,Pits,2019-06-30 16:00,8,3.6
10,1,7,7,28,15,1,145.33,2,19502.48,13,15,0.000102551,10.25510384,30-Jun,15:57:00,"1,5",28-Jun,2,2,4,Pits,2019-06-30 16:00,8,3.6
10,1,8,8,29,15,1,145.33,2,19502.48,13,16,0.000102551,10.25510384,30-Jun,15:57:00,"1,5",28-Jun,2,2,4,Pits,2019-06-30 16:00,8,3.6
10,1,9,9,27,15,1,145.33,2,19502.48,13,14,0.000102551,10.25510384,30-Jun,15:57:00,"1,5",28-Jun,2,2,4,Pits,2019-06-30 16:00,8,3.6
10,1,10,10,20,15,1,145.33,2,19502.48,13,7,0.000102551,10.25510384,30-Jun,15:57:00,"1,5",28-Jun,2,2,4,Pits,2019-06-30 16:00,8,3.6
10,1,11,11,,15,1,145.33,2,19502.48,13,,0.000102551,10.25510384,30-Jun,15:57:00,"1,5",28-Jun,2,2,4,Pits,2019-06-30 16:00,8,3.6
10,1,12,12,22,15,1,145.33,2,19502.48,13,9,0.000102551,10.25510384,30-Jun,15:57:00,"1,5",28-Jun,2,2,4,Pits,2019-06-30 16:00,8,3.6
10,2,1,13,29,16,2,286.67,2,19502.48,14,15,0.000102551,10.25510384,30-Jun,17:33:00,1,28-Jun,2,2,4,Pits,2019-06-30 17:30,8.6,4.3
10,2,2,14,17,16,2,286.67,2,19502.48,14,3,0.000102551,10.25510384,30-Jun,17:33:00,1,28-Jun,2,2,4,Pits,2019-06-30 17:30,8.6,4.3
10,2,3,15,14,16,2,286.67,2,19502.48,14,0,0.000102551,10.25510384,30-Jun,17:33:00,1,28-Jun,2,2,4,Pits,2019-06-30 17:30,8.6,4.3
10,2,4,16,14,16,2,286.67,2,19502.48,14,0,0.000102551,10.25510384,30-Jun,17:33:00,1,28-Jun,2,2,4,Pits,2019-06-30 17:30,8.6,4.3
10,2,5,17,,16,2,286.67,2,19502.48,14,,0.000102551,10.25510384,30-Jun,17:33:00,1,28-Jun,2,2,4,Pits,2019-06-30 17:30,8.6,4.3
10,2,6,18,13,16,2,286.67,2,19502.48,14,-1,0.000102551,10.25510384,30-Jun,17:33:00,1,28-Jun,2,2,4,Pits,2019-06-30 17:30,8.6,4.3
10,2,7,19,14,16,2,286.67,2,19502.48,14,0,0.000102551,10.25510384,30-Jun,17:33:00,1,28-Jun,2,2,4,Pits,2019-06-30 17:30,8.6,4.3
10,2,8,20,14,16,2,286.67,2,19502.48,14,0,0.000102551,10.25510384,30-Jun,17:33:00,1,28-Jun,2,2,4,Pits,2019-06-30 17:30,8.6,4.3
10,2,9,21,19,16,2,286.67,2,19502.48,14,5,0.000102551,10.25510384,30-Jun,17:33:00,1,28-Jun,2,2,4,Pits,2019-06-30 17:30,8.6,4.3
10,2,10,22,18,16,2,286.67,2,19502.48,14,4,0.000102551,10.25510384,30-Jun,17:33:00,1,28-Jun,2,2,4,Pits,2019-06-30 17:30,8.6,4.3
10,2,11,23,51,16,2,286.67,2,19502.48,14,37,0.000102551,10.25510384,30-Jun,17:33:00,1,28-Jun,2,2,4,Pits,2019-06-30 17:30,8.6,4.3
10,2,12,24,,16,2,286.67,2,19502.48,14,,0.000102551,10.25510384,30-Jun,17:33:00,1,28-Jun,2,2,4,Pits,2019-06-30 17:30,8.6,4.3
11,1,1,1,19,17,1,18.5,2,33230.76,17,2,6.02E-05,6.018519439,30-Jun,15:51:00,5,25-Jun,2,5,7,Pits,2019-06-30 16:00,8,3.6
11,1,2,2,20,17,1,18.5,2,33230.76,17,3,6.02E-05,6.018519439,30-Jun,15:51:00,5,25-Jun,2,5,7,Pits,2019-06-30 16:00,8,3.6
11,1,3,3,22,17,1,18.5,2,33230.76,17,5,6.02E-05,6.018519439,30-Jun,15:51:00,5,25-Jun,2,5,7,Pits,2019-06-30 16:00,8,3.6
11,1,4,4,30,17,1,18.5,2,33230.76,17,13,6.02E-05,6.018519439,30-Jun,15:51:00,5,25-Jun,2,5,7,Pits,2019-06-30 16:00,8,3.6
11,1,5,5,45,17,1,18.5,2,33230.76,17,28,6.02E-05,6.018519439,30-Jun,15:51:00,5,25-Jun,2,5,7,Pits,2019-06-30 16:00,8,3.6
11,1,6,6,25,17,1,18.5,2,33230.76,17,8,6.02E-05,6.018519439,30-Jun,15:51:00,5,25-Jun,2,5,7,Pits,2019-06-30 16:00,8,3.6
11,1,7,7,23,17,1,18.5,2,33230.76,17,6,6.02E-05,6.018519439,30-Jun,15:51:00,5,25-Jun,2,5,7,Pits,2019-06-30 16:00,8,3.6
11,1,8,8,17,17,1,18.5,2,33230.76,17,0,6.02E-05,6.018519439,30-Jun,15:51:00,5,25-Jun,2,5,7,Pits,2019-06-30 16:00,8,3.6
11,1,9,9,20,17,1,18.5,2,33230.76,17,3,6.02E-05,6.018519439,30-Jun,15:51:00,5,25-Jun,2,5,7,Pits,2019-06-30 16:00,8,3.6
11,1,10,10,13,17,1,18.5,2,33230.76,17,-4,6.02E-05,6.018519439,30-Jun,15:51:00,5,25-Jun,2,5,7,Pits,2019-06-30 16:00,8,3.6
11,1,11,11,10,17,1,18.5,2,33230.76,17,-7,6.02E-05,6.018519439,30-Jun,15:51:00,5,25-Jun,2,5,7,Pits,2019-06-30 16:00,8,3.6
11,1,12,12,8,17,1,18.5,2,33230.76,17,-9,6.02E-05,6.018519439,30-Jun,15:51:00,5,25-Jun,2,5,7,Pits,2019-06-30 16:00,8,3.6
11,1,1,1,38,18,2,131.08,14,33230.76,20,18,0.000421296,42.12963608,30-Jun,22:48:00,1,25-Jun,2,5,7,Pits,2019-06-30 23:00,3.3,5.2
11,1,2,2,37,18,2,131.08,14,33230.76,20,17,0.000421296,42.12963608,30-Jun,22:48:00,1,25-Jun,2,5,7,Pits,2019-06-30 23:00,3.3,5.2
11,1,3,3,55,18,2,131.08,14,33230.76,20,35,0.000421296,42.12963608,30-Jun,22:48:00,1,25-Jun,2,5,7,Pits,2019-06-30 23:00,3.3,5.2
11,1,4,4,40,18,2,131.08,14,33230.76,20,20,0.000421296,42.12963608,30-Jun,22:48:00,1,25-Jun,2,5,7,Pits,2019-06-30 23:00,3.3,5.2
11,1,5,5,39,18,2,131.08,14,33230.76,20,19,0.000421296,42.12963608,30-Jun,22:48:00,1,25-Jun,2,5,7,Pits,2019-06-30 23:00,3.3,5.2
11,1,6,6,46,18,2,131.08,14,33230.76,20,26,0.000421296,42.12963608,30-Jun,22:48:00,1,25-Jun,2,5,7,Pits,2019-06-30 23:00,3.3,5.2
11,1,7,7,40,18,2,131.08,14,33230.76,20,20,0.000421296,42.12963608,30-Jun,22:48:00,1,25-Jun,2,5,7,Pits,2019-06-30 23:00,3.3,5.2
11,1,8,8,34,18,2,131.08,14,33230.76,20,14,0.000421296,42.12963608,30-Jun,22:48:00,1,25-Jun,2,5,7,Pits,2019-06-30 23:00,3.3,5.2
11,1,9,9,39,18,2,131.08,14,33230.76,20,19,0.000421296,42.12963608,30-Jun,22:48:00,1,25-Jun,2,5,7,Pits,2019-06-30 23:00,3.3,5.2
11,1,10,10,38,18,2,131.08,14,33230.76,20,18,0.000421296,42.12963608,30-Jun,22:48:00,1,25-Jun,2,5,7,Pits,2019-06-30 23:00,3.3,5.2
11,1,11,11,,18,2,131.08,14,33230.76,20,,0.000421296,42.12963608,30-Jun,22:48:00,1,25-Jun,2,5,7,Pits,2019-06-30 23:00,3.3,5.2
11,1,12,12,,18,2,131.08,14,33230.76,20,,0.000421296,42.12963608,30-Jun,22:48:00,1,25-Jun,2,5,7,Pits,2019-06-30 23:00,3.3,5.2
11,2,1,13,31,18,2,139,14,33230.76,20,11,0.000421296,42.12963608,30-Jun,22:53:00,1,25-Jun,2,5,7,Pits,2019-06-30 23:00,3.3,5.2
11,2,2,14,,18,2,139,14,33230.76,20,,0.000421296,42.12963608,30-Jun,22:53:00,1,25-Jun,2,5,7,Pits,2019-06-30 23:00,3.3,5.2
11,2,3,15,,18,2,139,14,33230.76,20,,0.000421296,42.12963608,30-Jun,22:53:00,1,25-Jun,2,5,7,Pits,2019-06-30 23:00,3.3,5.2
11,2,4,16,,18,2,139,14,33230.76,20,,0.000421296,42.12963608,30-Jun,22:53:00,1,25-Jun,2,5,7,Pits,2019-06-30 23:00,3.3,5.2
11,2,5,17,31,18,2,139,14,33230.76,20,11,0.000421296,42.12963608,30-Jun,22:53:00,1,25-Jun,2,5,7,Pits,2019-06-30 23:00,3.3,5.2
11,2,6,18,26,18,2,139,14,33230.76,20,6,0.000421296,42.12963608,30-Jun,22:53:00,1,25-Jun,2,5,7,Pits,2019-06-30 23:00,3.3,5.2
11,2,7,19,30,18,2,139,14,33230.76,20,10,0.000421296,42.12963608,30-Jun,22:53:00,1,25-Jun,2,5,7,Pits,2019-06-30 23:00,3.3,5.2
11,2,8,20,28,18,2,139,14,33230.76,20,8,0.000421296,42.12963608,30-Jun,22:53:00,1,25-Jun,2,5,7,Pits,2019-06-30 23:00,3.3,5.2
11,2,9,21,24,18,2,139,14,33230.76,20,4,0.000421296,42.12963608,30-Jun,22:53:00,1,25-Jun,2,5,7,Pits,2019-06-30 23:00,3.3,5.2
11,2,10,22,,18,2,139,14,33230.76,20,,0.000421296,42.12963608,30-Jun,22:53:00,1,25-Jun,2,5,7,Pits,2019-06-30 23:00,3.3,5.2
11,2,11,23,,18,2,139,14,33230.76,20,,0.000421296,42.12963608,30-Jun,22:53:00,1,25-Jun,2,5,7,Pits,2019-06-30 23:00,3.3,5.2
11,2,12,24,23,18,2,139,14,33230.76,20,3,0.000421296,42.12963608,30-Jun,22:53:00,1,25-Jun,2,5,7,Pits,2019-06-30 23:00,3.3,5.2
11,3,1,25,38,18,2,82.75,14,33230.76,20,18,0.000421296,42.12963608,30-Jun,22:58:00,1,25-Jun,2,5,7,Pits,2019-06-30 23:00,3.3,5.2
11,3,2,26,33,18,2,82.75,14,33230.76,20,13,0.000421296,42.12963608,30-Jun,22:58:00,1,25-Jun,2,5,7,Pits,2019-06-30 23:00,3.3,5.2
11,3,3,27,50,18,2,82.75,14,33230.76,20,30,0.000421296,42.12963608,30-Jun,22:58:00,1,25-Jun,2,5,7,Pits,2019-06-30 23:00,3.3,5.2
11,3,4,28,47,18,2,82.75,14,33230.76,20,27,0.000421296,42.12963608,30-Jun,22:58:00,1,25-Jun,2,5,7,Pits,2019-06-30 23:00,3.3,5.2
11,3,5,29,44,18,2,82.75,14,33230.76,20,24,0.000421296,42.12963608,30-Jun,22:58:00,1,25-Jun,2,5,7,Pits,2019-06-30 23:00,3.3,5.2
11,3,6,30,37,18,2,82.75,14,33230.76,20,17,0.000421296,42.12963608,30-Jun,22:58:00,1,25-Jun,2,5,7,Pits,2019-06-30 23:00,3.3,5.2
11,3,7,31,40,18,2,82.75,14,33230.76,20,20,0.000421296,42.12963608,30-Jun,22:58:00,1,25-Jun,2,5,7,Pits,2019-06-30 23:00,3.3,5.2
11,3,8,32,,18,2,82.75,14,33230.76,20,,0.000421296,42.12963608,30-Jun,22:58:00,1,25-Jun,2,5,7,Pits,2019-06-30 23:00,3.3,5.2
11,3,9,33,,18,2,82.75,14,33230.76,20,,0.000421296,42.12963608,30-Jun,22:58:00,1,25-Jun,2,5,7,Pits,2019-06-30 23:00,3.3,5.2
11,3,10,34,,18,2,82.75,14,33230.76,20,,0.000421296,42.12963608,30-Jun,22:58:00,1,25-Jun,2,5,7,Pits,2019-06-30 23:00,3.3,5.2
11,3,11,35,34,18,2,82.75,14,33230.76,20,14,0.000421296,42.12963608,30-Jun,22:58:00,1,25-Jun,2,5,7,Pits,2019-06-30 23:00,3.3,5.2
11,3,12,36,30,18,2,82.75,14,33230.76,20,10,0.000421296,42.12963608,30-Jun,22:58:00,1,25-Jun,2,5,7,Pits,2019-06-30 23:00,3.3,5.2
11,1,1,1,23,19,3,93,1,33230.76,15,8,3.01E-05,3.00925972,02-Jul,6:32:00,5,25-Jun,2,7,9,Pits,2019-07-02 6:30,1.2,8.3
11,1,2,2,,19,3,93,1,33230.76,15,,3.01E-05,3.00925972,02-Jul,6:32:00,5,25-Jun,2,7,9,Pits,2019-07-02 6:30,1.2,8.3
11,1,3,3,22,19,3,93,1,33230.76,15,7,3.01E-05,3.00925972,02-Jul,6:32:00,5,25-Jun,2,7,9,Pits,2019-07-02 6:30,1.2,8.3
11,1,4,4,19,19,3,93,1,33230.76,15,4,3.01E-05,3.00925972,02-Jul,6:32:00,5,25-Jun,2,7,9,Pits,2019-07-02 6:30,1.2,8.3
11,1,5,5,20,19,3,93,1,33230.76,15,5,3.01E-05,3.00925972,02-Jul,6:32:00,5,25-Jun,2,7,9,Pits,2019-07-02 6:30,1.2,8.3
11,1,6,6,20,19,3,93,1,33230.76,15,5,3.01E-05,3.00925972,02-Jul,6:32:00,5,25-Jun,2,7,9,Pits,2019-07-02 6:30,1.2,8.3
11,1,7,7,22,19,3,93,1,33230.76,15,7,3.01E-05,3.00925972,02-Jul,6:32:00,5,25-Jun,2,7,9,Pits,2019-07-02 6:30,1.2,8.3
11,1,8,8,27,19,3,93,1,33230.76,15,12,3.01E-05,3.00925972,02-Jul,6:32:00,5,25-Jun,2,7,9,Pits,2019-07-02 6:30,1.2,8.3
11,1,9,9,28,19,3,93,1,33230.76,15,13,3.01E-05,3.00925972,02-Jul,6:32:00,5,25-Jun,2,7,9,Pits,2019-07-02 6:30,1.2,8.3
11,1,10,10,19,19,3,93,1,33230.76,15,4,3.01E-05,3.00925972,02-Jul,6:32:00,5,25-Jun,2,7,9,Pits,2019-07-02 6:30,1.2,8.3
11,1,11,11,21,19,3,93,1,33230.76,15,6,3.01E-05,3.00925972,02-Jul,6:32:00,5,25-Jun,2,7,9,Pits,2019-07-02 6:30,1.2,8.3
11,1,12,12,20,19,3,93,1,33230.76,15,5,3.01E-05,3.00925972,02-Jul,6:32:00,5,25-Jun,2,7,9,Pits,2019-07-02 6:30,1.2,8.3
11,1,1,1,,20,4,179,1,33230.76,17,,3.01E-05,3.00925972,02-Jul,6:59:00,1,25-Jun,2,11,13,Pits,2019-07-06 7:00,4.4,0
11,1,2,2,,20,4,179,1,33230.76,17,,3.01E-05,3.00925972,02-Jul,6:59:00,1,25-Jun,2,11,13,Pits,2019-07-06 7:00,4.4,0
11,1,3,3,,20,4,179,1,33230.76,17,,3.01E-05,3.00925972,06-Jul,6:59:00,1,25-Jun,2,11,13,Pits,2019-07-06 7:00,4.4,0
11,1,4,4,17,20,4,179,1,33230.76,17,0,3.01E-05,3.00925972,06-Jul,6:59:00,1,25-Jun,2,11,13,Pits,2019-07-06 7:00,4.4,0
11,1,5,5,17,20,4,179,1,33230.76,17,0,3.01E-05,3.00925972,06-Jul,6:59:00,1,25-Jun,2,11,13,Pits,2019-07-06 7:00,4.4,0
11,1,6,6,17,20,4,179,1,33230.76,17,0,3.01E-05,3.00925972,06-Jul,6:59:00,1,25-Jun,2,11,13,Pits,2019-07-06 7:00,4.4,0
11,1,7,7,16,20,4,179,1,33230.76,17,-1,3.01E-05,3.00925972,06-Jul,6:59:00,1,25-Jun,2,11,13,Pits,2019-07-06 7:00,4.4,0
11,1,8,8,,20,4,179,1,33230.76,17,,3.01E-05,3.00925972,06-Jul,6:59:00,1,25-Jun,2,11,13,Pits,2019-07-06 7:00,4.4,0
11,1,9,9,16,20,4,179,1,33230.76,17,-1,3.01E-05,3.00925972,06-Jul,6:59:00,1,25-Jun,2,11,13,Pits,2019-07-06 7:00,4.4,0
11,1,10,10,,20,4,179,1,33230.76,17,,3.01E-05,3.00925972,06-Jul,6:59:00,1,25-Jun,2,11,13,Pits,2019-07-06 7:00,4.4,0
11,1,11,11,,20,4,179,1,33230.76,17,,3.01E-05,3.00925972,06-Jul,6:59:00,1,25-Jun,2,11,13,Pits,2019-07-06 7:00,4.4,0
11,1,12,12,16,20,4,179,1,33230.76,17,-1,3.01E-05,3.00925972,06-Jul,6:59:00,1,25-Jun,2,11,13,Pits,2019-07-06 7:00,4.4,0
11,1,1,1,17,21,5,17,1,33230.76,14,3,3.01E-05,3.00925972,06-Jul,19:54:00,1,25-Jun,2,11,13,Pits,2019-07-06 20:00,1.7,3.9
11,1,2,2,18,21,5,17,1,33230.76,14,4,3.01E-05,3.00925972,06-Jul,19:54:00,1,25-Jun,2,11,13,Pits,2019-07-06 20:00,1.7,3.9
11,1,3,3,17,21,5,17,1,33230.76,14,3,3.01E-05,3.00925972,06-Jul,19:54:00,1,25-Jun,2,11,13,Pits,2019-07-06 20:00,1.7,3.9
11,1,4,4,22,21,5,17,1,33230.76,14,8,3.01E-05,3.00925972,06-Jul,19:54:00,1,25-Jun,2,11,13,Pits,2019-07-06 20:00,1.7,3.9
11,1,5,5,21,21,5,17,1,33230.76,14,7,3.01E-05,3.00925972,06-Jul,19:54:00,1,25-Jun,2,11,13,Pits,2019-07-06 20:00,1.7,3.9
11,1,6,6,24,21,5,17,1,33230.76,14,10,3.01E-05,3.00925972,06-Jul,19:54:00,1,25-Jun,2,11,13,Pits,2019-07-06 20:00,1.7,3.9
11,1,7,7,22,21,5,17,1,33230.76,14,8,3.01E-05,3.00925972,06-Jul,19:54:00,1,25-Jun,2,11,13,Pits,2019-07-06 20:00,1.7,3.9
11,1,8,8,21,21,5,17,1,33230.76,14,7,3.01E-05,3.00925972,06-Jul,19:54:00,1,25-Jun,2,11,13,Pits,2019-07-06 20:00,1.7,3.9
11,1,9,9,,21,5,17,1,33230.76,14,,3.01E-05,3.00925972,06-Jul,19:54:00,1,25-Jun,2,11,13,Pits,2019-07-06 20:00,1.7,3.9
11,1,10,10,,21,5,17,1,33230.76,14,,3.01E-05,3.00925972,06-Jul,19:54:00,1,25-Jun,2,11,13,Pits,2019-07-06 20:00,1.7,3.9
11,1,11,11,19,21,5,17,1,33230.76,14,5,3.01E-05,3.00925972,06-Jul,19:54:00,1,25-Jun,2,11,13,Pits,2019-07-06 20:00,1.7,3.9
11,1,12,12,22,21,5,17,1,33230.76,14,8,3.01E-05,3.00925972,06-Jul,19:54:00,1,25-Jun,2,11,13,Pits,2019-07-06 20:00,1.7,3.9
